# Supplementary material for: Lean mass and lower limb muscle function in relation to hip strength, geometry and fracture risk indices in community-dwelling older women
Source: Springer Nature journal article supplement (doi:10.1007/s00198-018-4795-z), 2018-12-14

**Online Resource 2** Age-adjusted mean femoral neck bone mineral density (BMD), cross-sectional moment of inertia, minimum neck width, and intertrochanteric and subtrochanteric fracture risk indices across EWGSOP and SPPB groups (n=358). P-values were from F test comparing overall difference of means.

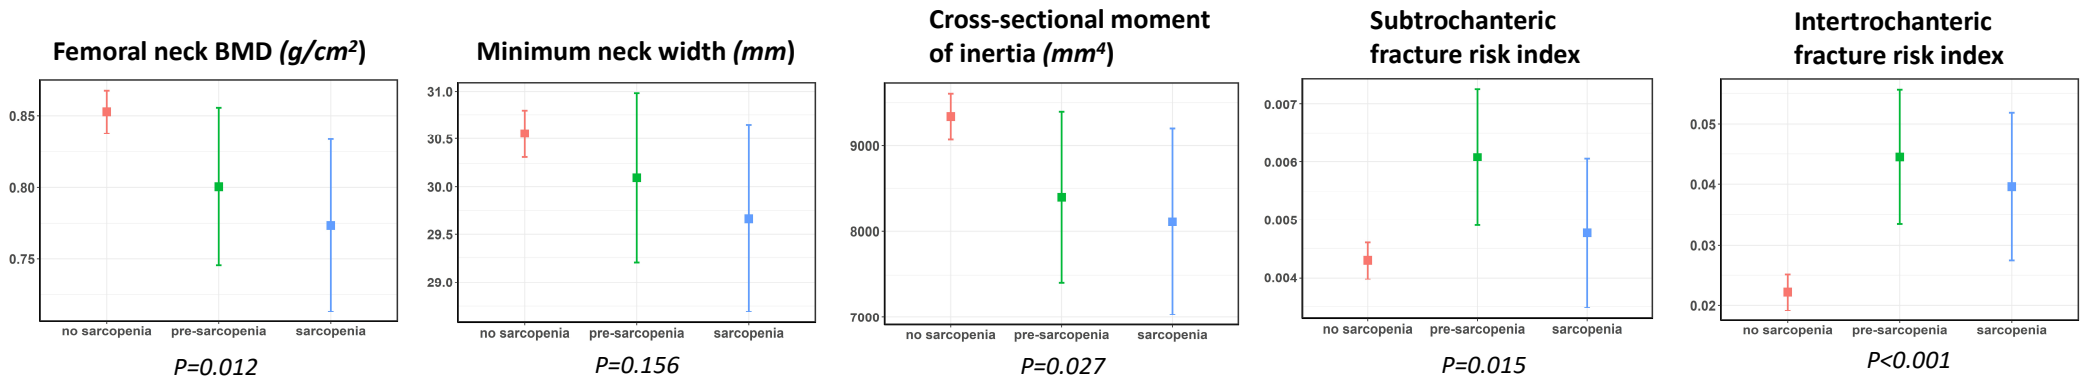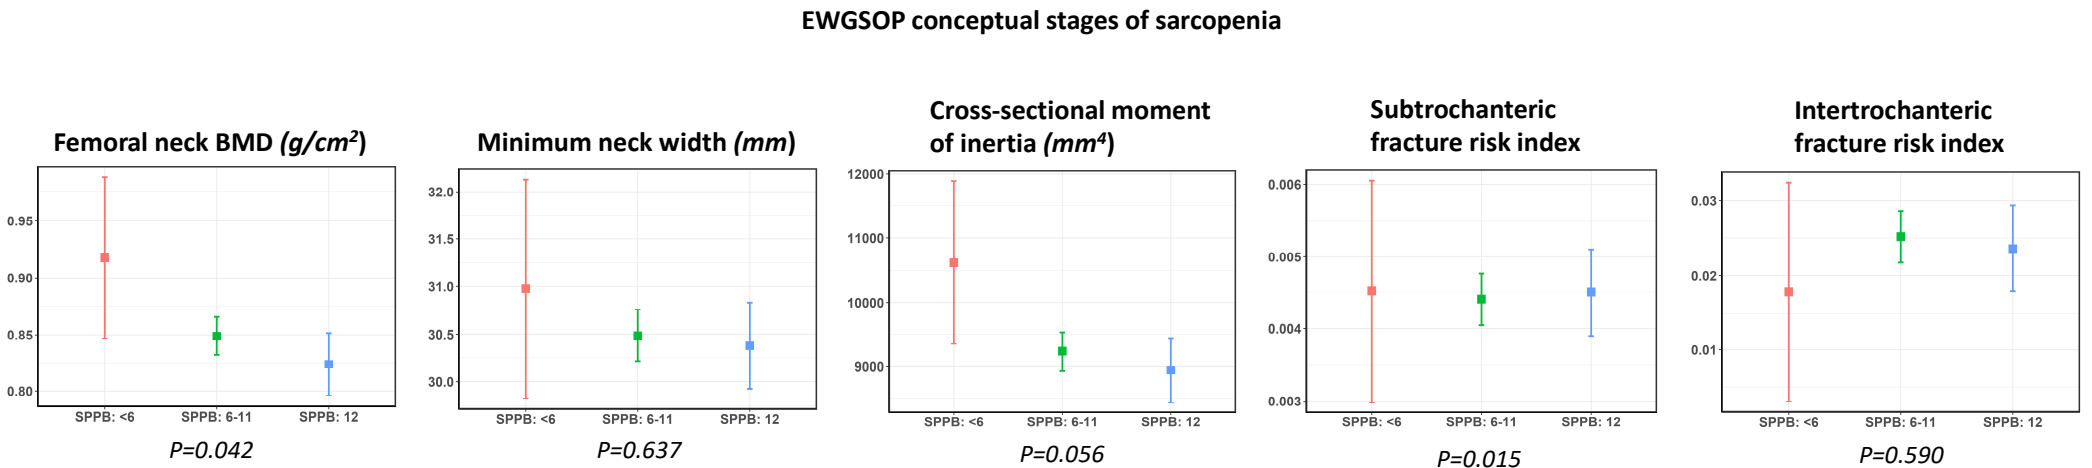

Supplement: MOESM2 [file 16343096]
