# Supplementary material for: Lean mass and lower limb muscle function in relation to hip strength, geometry and fracture risk indices in community-dwelling older women
Source: Springer Nature journal article supplement (doi:10.1007/s00198-018-4795-z), 2018-12-14
Supplement: MOESM3 [file 16343096]

**Online Resource 3** Difference in standard deviation (SD) units in each bone parameter per SD unit difference in total body lean mass, lower limb lean mass and appendicular lean mass index (n=241).

|                                              | Model 1<br>$\beta$ (95% CI) | <i>P</i> | Model 2<br>$\beta$ (95% CI) | <i>P</i> |
|----------------------------------------------|-----------------------------|----------|-----------------------------|----------|
| <b>Total hip BMD</b>                         |                             |          |                             |          |
| total body lean mass                         | 0.455 (0.316 to 0.595)      | <0.001   | 0.363 (0.170 to 0.555)      | <0.001   |
| appendicular lean mass index                 | 0.483 (0.341 to 0.625)      | <0.001   | 0.304 (0.121 to 0.487)      | 0.001    |
| lower limb lean mass                         | 0.358 (0.241 to 0.475)      | <0.001   | 0.207 (0.034 to 0.381)      | 0.020    |
| <b>Femoral neck BMD</b>                      |                             |          |                             |          |
| total body lean mass                         | 0.393 (0.251 to 0.534)      | <0.001   | 0.258 (0.059 to 0.457)      | 0.012    |
| appendicular lean mass index                 | 0.338 (0.190 to 0.485)      | <0.001   | 0.175 (-0.016 to 0.366)     | 0.073    |
| lower limb lean mass                         | 0.287 (0.167 to 0.406)      | <0.001   | 0.104 (-0.075 to 0.282)     | 0.256    |
| <b>Cross-sectional moment of inertia</b>     |                             |          |                             |          |
| total body lean mass                         | 0.546 (0.411 to 0.680)      | <0.001   | 0.238 (0.056 to 0.420)      | 0.011    |
| appendicular lean mass index                 | 0.278 (0.127 to 0.429)      | <0.001   | 0.052 (-0.142 to 0.246)     | 0.600    |
| lower limb lean mass                         | 0.403 (0.288 to 0.518)      | <0.001   | 0.108 (-0.055 to 0.271)     | 0.195    |
| <b>Minimum neck width</b>                    |                             |          |                             |          |
| total body lean mass                         | 0.453 (0.311 to 0.595)      | <0.001   | 0.169 (-0.020 to 0.358)     | 0.081    |
| appendicular lean mass index                 | 0.133 (-0.022 to 0.289)     | 0.095    | -0.030 (-0.232 to 0.173)    | 0.773    |
| lower limb lean mass                         | 0.333 (0.213 to 0.453)      | <0.001   | 0.094 (-0.074 to 0.263)     | 0.273    |
| <b>Femoral neck fracture risk index</b>      |                             |          |                             |          |
| total body lean mass                         | -0.164 (-0.296 to -0.032)   | 0.016    | -0.209 (-0.397 to -0.022)   | 0.029    |
| appendicular lean mass index                 | -0.200 (-0.334 to -0.065)   | 0.004    | -0.192 (-0.369 to -0.015)   | 0.035    |
| lower limb lean mass                         | -0.116 (-0.227 to -0.006)   | 0.040    | -0.120 (-0.287 to 0.047)    | 0.161    |
| <b>Subtrochanteric fracture risk index</b>   |                             |          |                             |          |
| total body lean mass                         | -0.023 (-0.165 to 0.119)    | 0.751    | -0.083 (-0.280 to 0.115)    | 0.412    |
| appendicular lean mass index                 | -0.193 (-0.337 to -0.050)   | 0.009    | -0.178 (-0.366 to 0.011)    | 0.066    |
| lower limb lean mass                         | -0.032 (-0.150 to 0.087)    | 0.601    | -0.045 (-0.220 to 0.130)    | 0.612    |
| <b>Intertrochanteric fracture risk index</b> |                             |          |                             |          |
| total body lean mass                         | -0.123 (-0.204 to -0.041)   | 0.003    | -0.112 (-0.224 to 0.000)    | 0.052    |
| appendicular lean mass index                 | -0.173 (-0.255 to -0.091)   | <0.001   | -0.110 (-0.216 to -0.003)   | 0.044    |
| lower limb lean mass                         | -0.104 (-0.172 to -0.037)   | 0.003    | -0.068 (-0.168 to 0.032)    | 0.183    |

Model 1 adjusted for age. Model 2: adjusted for age, height (except for appendicular lean mass index), fat mass and comorbidities.
